# Supplementary material for: Potential Use of Precipitates from Acid Mine Drainage (AMD) as Arsenic Adsorbents
Source: MDPI journal article supplement (doi:10.3390/w15183179), 2023-09-06
Supplement: s1 [file s1]

## Potential Use of Precipitates from Acid Mine Drainage (AMD) as Arsenic Adsorbents

Karina Torres-Rivero <sup>1,2,\*</sup>, Julio Bastos-Arrieta <sup>3,4</sup>, Antonio Florido <sup>1,2</sup> and Vicenç Martí <sup>1,2</sup>

<sup>1</sup> Departament d'Enginyeria Química, Escola d'Enginyeria de Barcelona Est (EEBE), Universitat Politècnica de Catalunya, BarcelonetaTEch (UPC), Av. Eduard Maristany 16, 08019 Barcelona, Spain; antonio.florido@upc.edu (A.F.); vicens.marti@upc.edu (V.M.)

<sup>2</sup> Barcelona Research Center for Multiscale Science and Engineering, Av. Eduard Maristany 16, 08019 Barcelona, Spain

<sup>3</sup> Departament d'Enginyeria Química i Química Analítica, Facultat de Química, Universitat de Barcelona, Martí i Franquès 1-11, 08028 Barcelona, Spain; julio.bastos@ub.edu

<sup>4</sup> Institut de Recerca de l'Aigua (IdRA), Universitat de Barcelona (UB), 08028 Barcelona, Spain

\* Correspondence: karina.torres.rivero@upc.edu

**Table S1.** ICP-OES limits of detection for every element concentration presented in Peña del Hierro AMD-0 and AMD-1 and AMD-2

| Element                       | LOD (mg L <sup>-1</sup> ) |            |
|-------------------------------|---------------------------|------------|
|                               | PFe-AMD0                  | PFe-AMD1/2 |
| Fe                            | 0.13                      | 0.040      |
| Al                            | 0.42                      | 0.030      |
| S                             | 0.16                      | 0.144      |
| Mg                            | 0.24                      | 0.120      |
| Cu                            | 0.07                      | 0.001      |
| Ca                            | 0.94                      | 0.014      |
| Zn                            | 0.1                       | 0.002      |
| As                            | 0.03                      | 0.008      |
| Ni                            | 0.05                      | 0.002      |
| Cd                            | 0.01                      | 0.001      |
| Pb                            | 0.02                      | 0.004      |
| Na                            | 1.54                      | 0.050      |
| K                             | 2.48                      | 0.090      |
| SO <sub>4</sub> <sup>2-</sup> | 0.07                      | 0.060      |

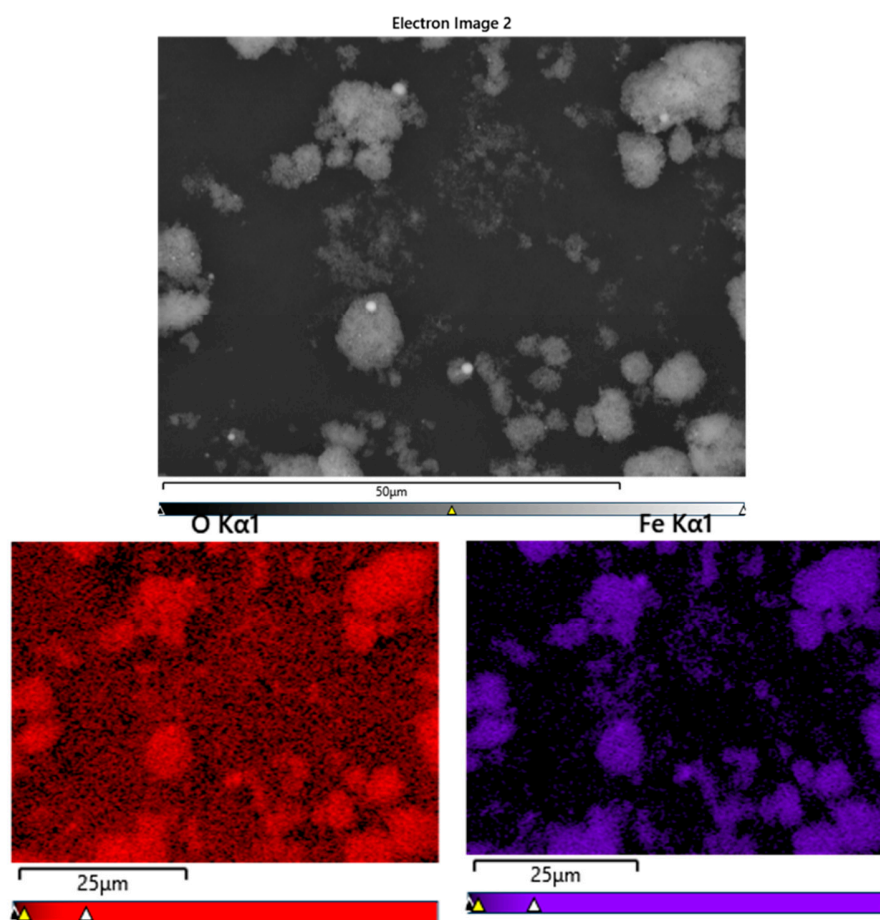

**Figure S1.** Energy dispersive X-ray (EDX) mapping analysis of nanohematite

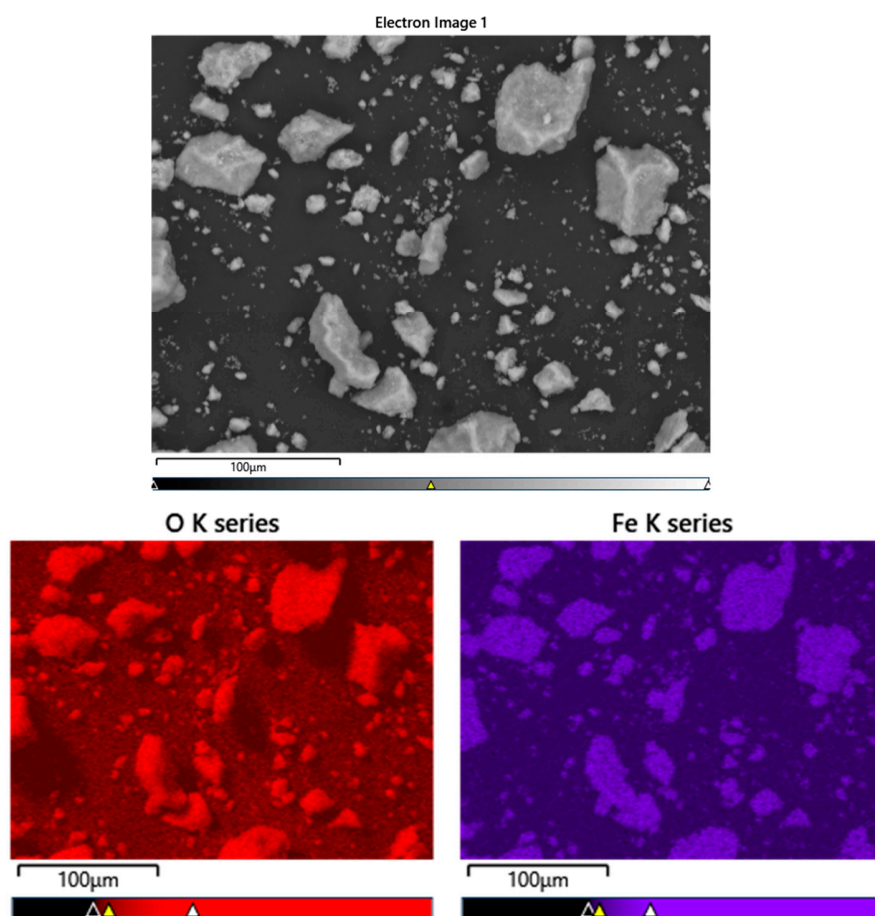

**Figure S2.** Energy dispersive X-ray (EDX) mapping analysis of Bayoxide

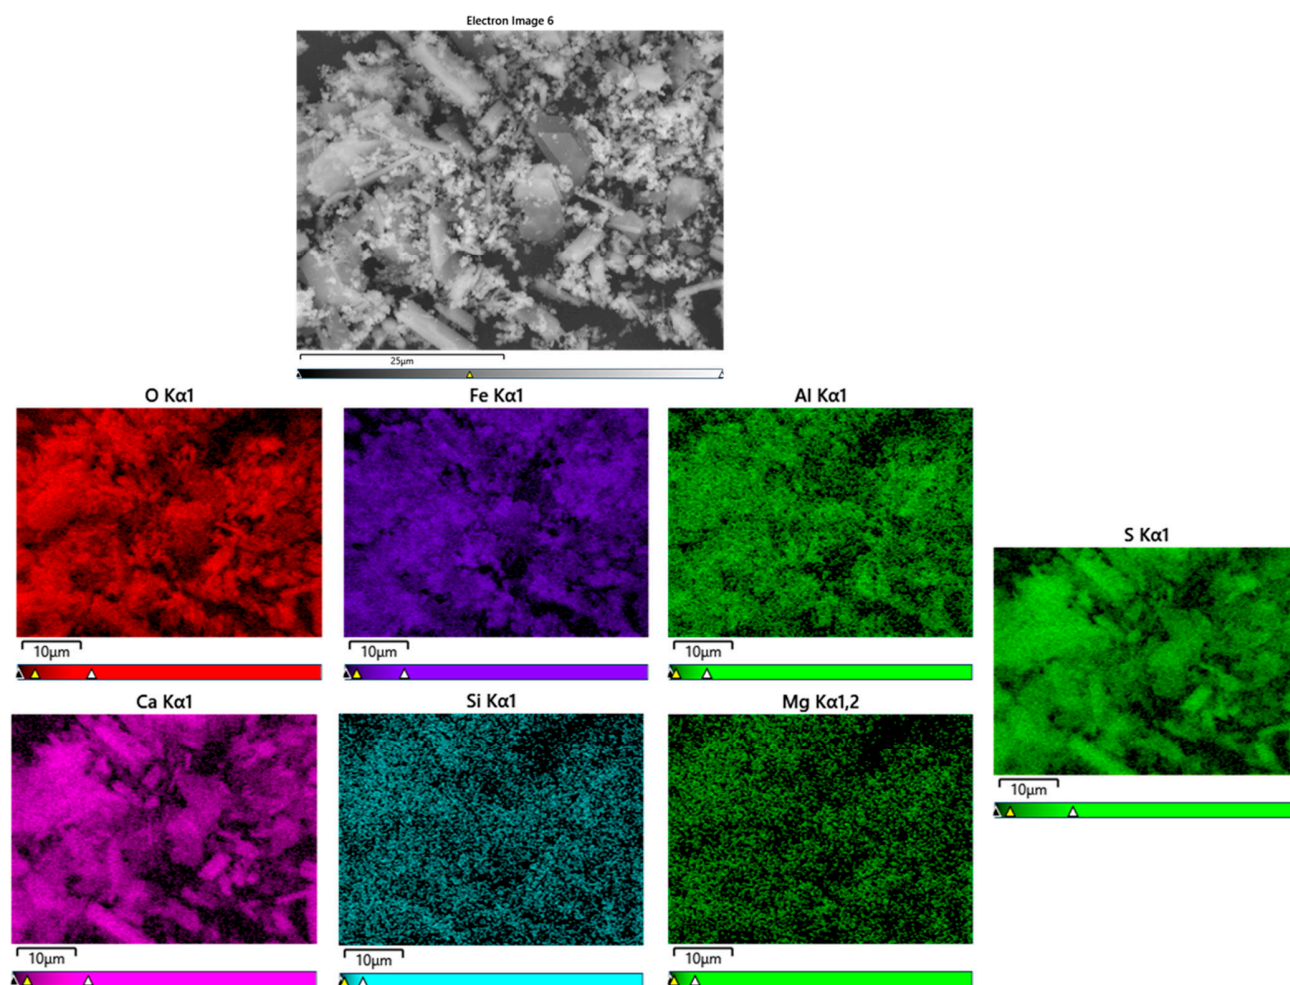

**Figure S3.** Energy dispersive X-ray (EDX) mapping analysis of OxPFe1

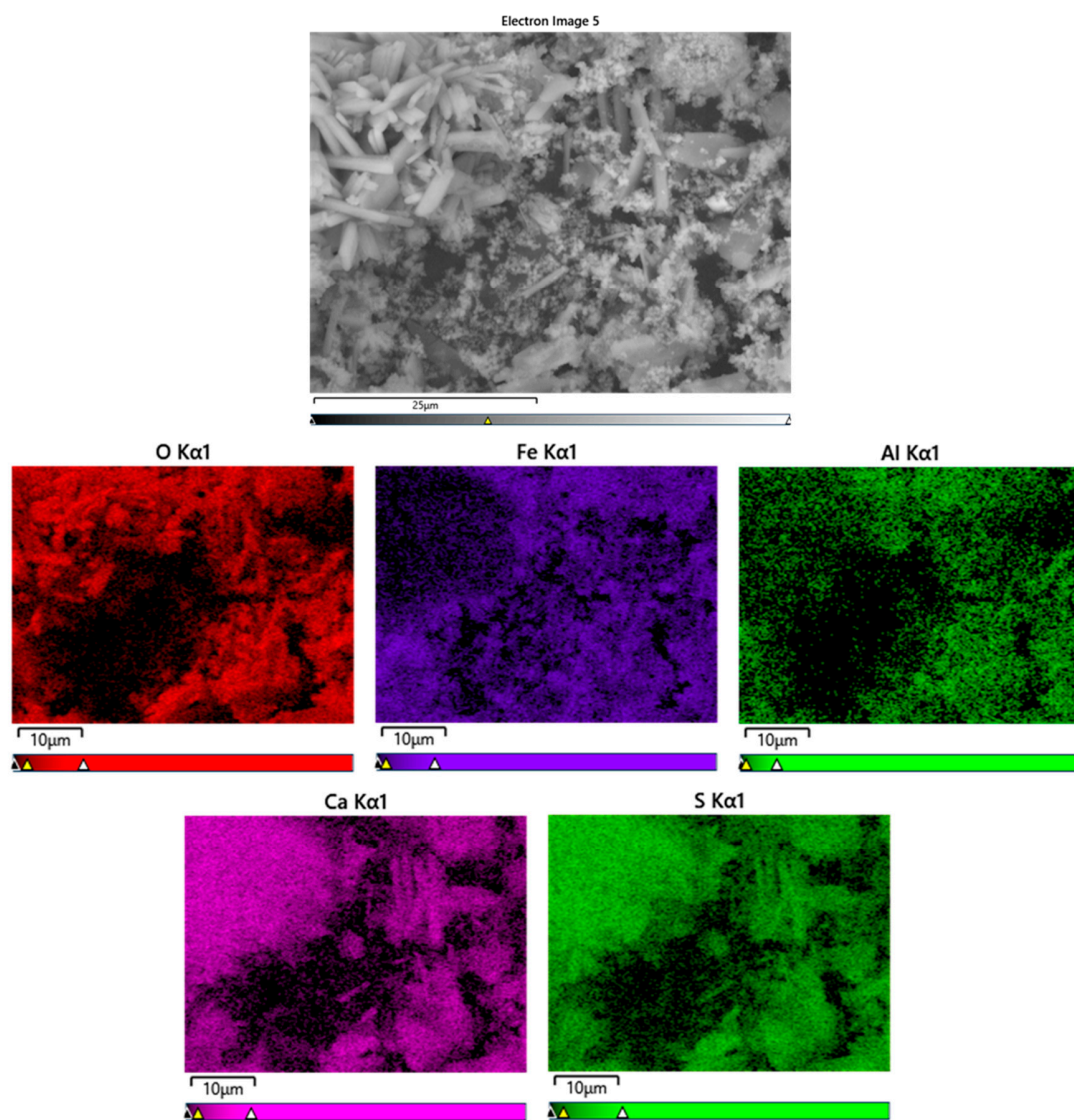

**Figure S4.** Energy dispersive X-ray (EDX) mapping analysis of OxPFe2

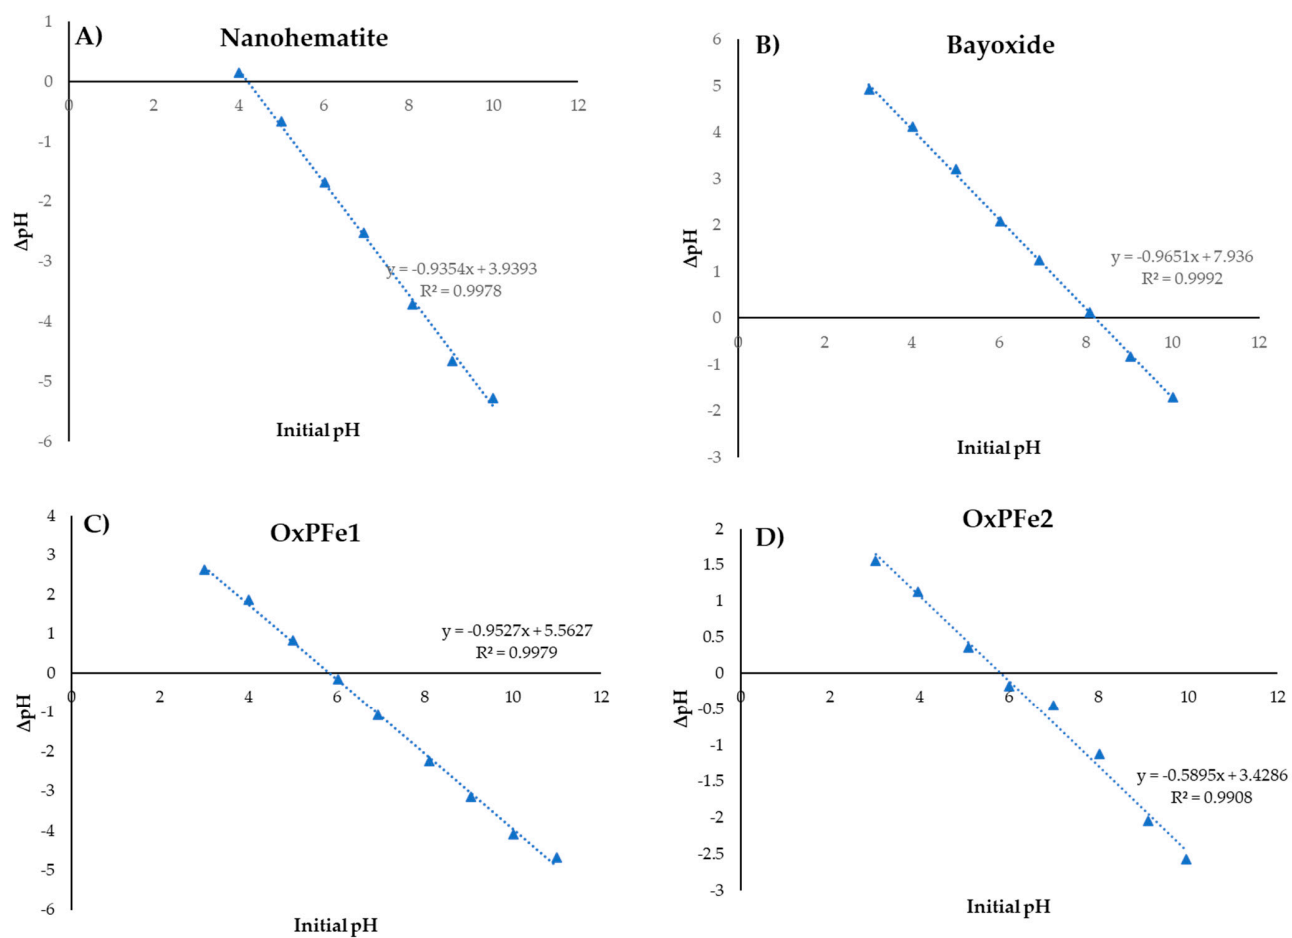

**Figure S5.** Calculated point of zero charge ( $\text{pH}_{\text{PZC}}$ ) using the immersion technique for A) Nanohematite, B) Bayoxide®, C) OxPFe1, and D) OxPFe2

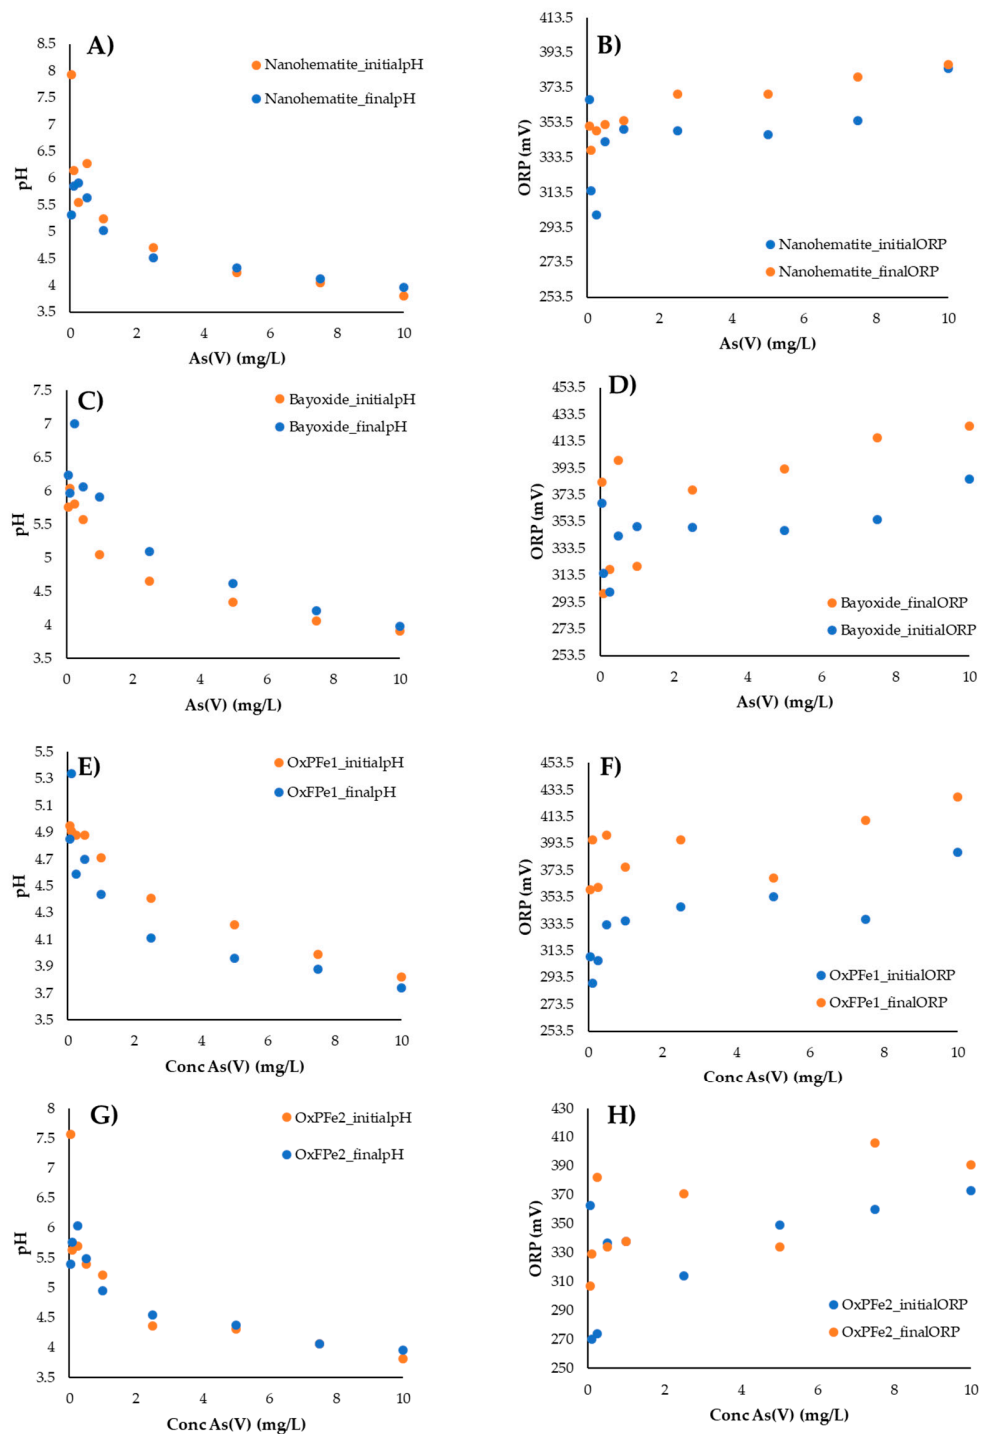

**Figure S6.** pH and oxidation redox potential (ORP) values before and after putting in contact the studied solids and the As(V) solutions A), B) Nano hematite; C), D) Bayoxide® E), F) OxPFe1, and G), H) OxPFe2.



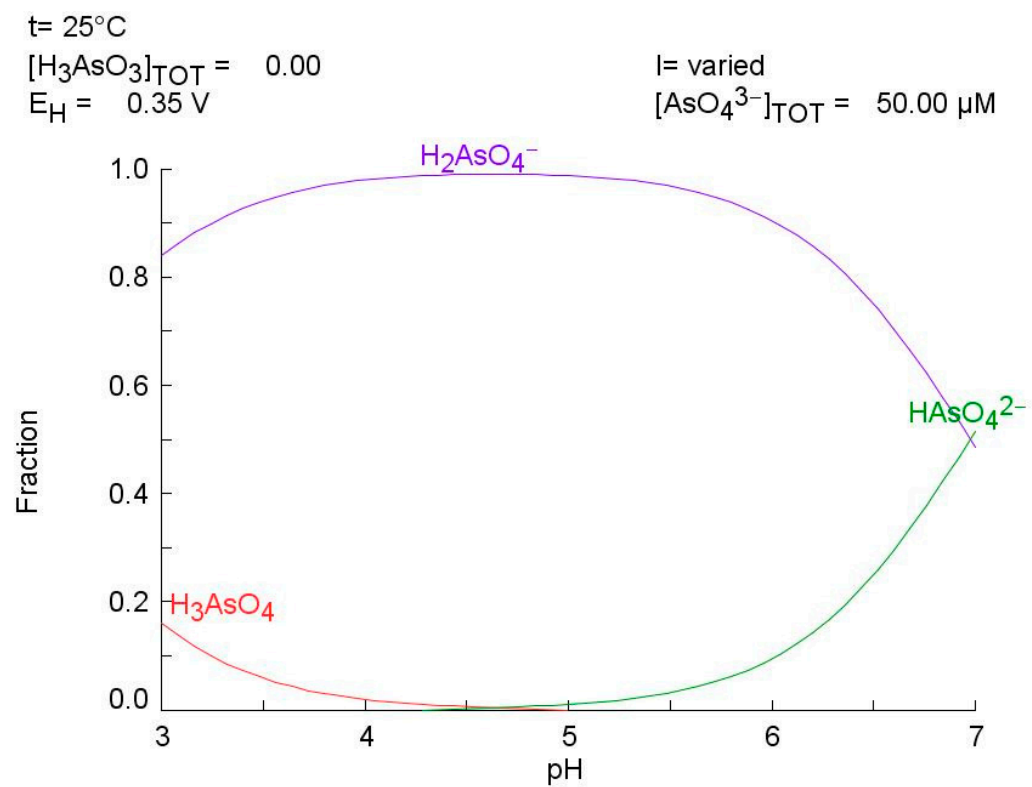

**Figure S7.** Theoretical aqueous speciation of As(V) as a function of adsorption conditions (redox potential (ORP)=0.35 V, total As(V) corresponding to 3.7 mg/L)
